# Supplementary material for: Long-term exposure to diesel engine exhaust affects cytokine expression among occupational population
Source: Royal Society of Chemistry journal article supplement (doi:10.1039/c5tx00462d), 2016-01-01
Supplement: c5tx00462d1.pdf [file c5tx00462d1.pdf]

**Supplementary Table 1** The correlations among cytokines, CRP, and 1-OHP

|                                | CRP   | IL-1 $\beta$ | IL-6   | IL-8   | MIP-1 $\beta$ | TNF- $\alpha$ | MCP-1  | 1-OHP  |
|--------------------------------|-------|--------------|--------|--------|---------------|---------------|--------|--------|
| <b>CRP</b>                     |       |              |        |        |               |               |        |        |
| Correlation coefficient, r     | 1.00  | 0.05         | 0.06   | 0.01   | 0.14          | 0.11          | -0.10  | 0.24   |
| <i>P</i> value                 | -     | 0.42         | 0.33   | 0.82   | 0.023         | 0.10          | 0.14   | <0.001 |
| <b>IL-1<math>\beta</math></b>  |       |              |        |        |               |               |        |        |
| Correlation coefficient, r     | 0.05  | 1.00         | 0.37   | 0.27   | 0.58          | 0.12          | 0.18   | -0.02  |
| <i>P</i> value                 | 0.42  | -            | <0.001 | <0.001 | <0.001        | 0.06          | 0.004  | 0.76   |
| <b>IL-6</b>                    |       |              |        |        |               |               |        |        |
| Correlation coefficient, r     | 0.06  | 0.37         | 1.00   | 0.73   | 0.48          | 0.63          | -0.05  | -0.07  |
| <i>P</i> value                 | 0.33  | <0.001       | -      | <0.001 | <0.001        | <0.001        | 0.43   | 0.25   |
| <b>IL-8</b>                    |       |              |        |        |               |               |        |        |
| Correlation coefficient, r     | 0.01  | 0.27         | 0.72   | 1.00   | 0.40          | 0.56          | -0.11  | -0.16  |
| <i>P</i> value                 | 0.82  | <0.001       | <0.001 | -      | <0.001        | <0.001        | 0.07   | 0.011  |
| <b>MIP-1<math>\beta</math></b> |       |              |        |        |               |               |        |        |
| Correlation coefficient, r     | 0.14  | 0.58         | 0.48   | 0.40   | 1.00          | 0.36          | 0.23   | -0.05  |
| <i>P</i> value                 | 0.023 | <0.001       | <0.001 | <0.001 | -             | <0.001        | <0.001 | 0.41   |
| <b>TNF-<math>\alpha</math></b> |       |              |        |        |               |               |        |        |
| Correlation coefficient, r     | 0.11  | 0.12         | 0.63   | 0.56   | 0.36          | 1.00          | -0.10  | 0.11   |
| <i>P</i> value                 | 0.10  | 0.06         | <0.001 | <0.001 | 0.000         | -             | 0.11   | 0.08   |
| <b>MCP-1</b>                   |       |              |        |        |               |               |        |        |

|                            |        |       |       |       |        |       |       |       |
|----------------------------|--------|-------|-------|-------|--------|-------|-------|-------|
| Correlation coefficient, r | -0.10  | 0.18  | -0.05 | -0.11 | 0.23   | -0.10 | 1.00  | -0.07 |
| <i>P</i> value             | 0.14   | 0.004 | 0.43  | 0.07  | <0.001 | 0.11  | -     | 0.29  |
| 1-OHP                      |        |       |       |       |        |       |       |       |
| Correlation coefficient, r | 0.24   | -0.02 | -0.07 | -0.16 | -0.05  | 0.11  | -0.07 | 1.00  |
| <i>P</i> value             | <0.001 | 0.76  | 0.25  | 0.011 | 0.41   | 0.08  | 0.29  | -     |

CRP, C-reactive protein; IL, interleukin; MIP, macrophage inflammatory protein; TNF, tumor necrosis factor; MCP, monocyte chemotactic protein; 1-OHP, 1-hydroxypyrene.
